# 1 Peroxisomes contribute to intracellular calcium dynamics

2 Yelena Sargsyan<sup>1</sup>, Uta Bickmeyer<sup>1</sup>, Katrin Streckfuss-Bömeke<sup>2,4</sup>, Ivan Bogeski<sup>3</sup>, Sven Thoms<sup>1,4\*</sup>

3 <sup>1</sup>Department of Child and Adolescent Health, University Medical Center, Göttingen, Germany

4 <sup>2</sup>Clinic for Cardiology and Pneumology, University Medical Center, Göttingen, Germany

5 <sup>3</sup>Molecular Physiology, Institute of Cardiovascular Physiology, University Medical Center, Göttingen,  
6 Germany

7 <sup>4</sup>German Center of Cardiovascular Research (DZHK), Partner site Göttingen, Germany

8 \* Correspondence: [sven.thoms@med.uni-goettingen.de](mailto:sven.thoms@med.uni-goettingen.de)

9 **Keywords:** peroxisomes, calcium, genetically encoded calcium indicator (GECI), cardiomyocytes, iPSC

## 10 Abstract

11 Peroxisomes communicate with other cellular compartments by transfer of various metabolites. However,  
12 whether peroxisomes are sites for calcium handling and exchange has remained contentious. Here we  
13 generated sensors for assessment of peroxisomal calcium and applied them for single cell-based calcium  
14 imaging in HeLa cells and cardiomyocytes. We found that peroxisomes in HeLa cells take up calcium upon  
15 depletion of intracellular calcium stores and upon calcium influx across the plasma membrane. Further, we  
16 show that peroxisomes of neonatal rat cardiomyocytes and human induced pluripotent stem cell-derived  
17 cardiomyocytes can take up calcium in a controlled manner. Our results indicate that peroxisomal and  
18 cytosolic calcium signals are tightly interconnected. Hence, peroxisomes may play an important role in  
19 shaping cellular calcium dynamics by serving as buffers or sources of intracellular calcium.

## 20 Introduction

21 Calcium ions ( $\text{Ca}^{2+}$ ) play a decisive role in the regulation of many cellular processes and inter-compartment  
22 communication, especially in excitable cells like neurons or cardiomyocytes (CMs) (Clapham, 2007). In CMs,  
23 for example, cytosolic  $\text{Ca}^{2+}$  directly engages in cell contraction. At the same time, mitochondrial  $\text{Ca}^{2+}$   
24 coordinates ATP production and energy demand in CMs (Williams et al., 2015), highlighting the importance  
25 of intracellular organelles in  $\text{Ca}^{2+}$  redistribution. The main sites of  $\text{Ca}^{2+}$  entry to the cell and intracellular  
26 calcium signal regulation are the plasma membrane (PM) and intracellular calcium stores, in particular those  
27 of the endoplasmic reticulum (ER) (Paupe and Prudent, 2018).

28 Excess of organellar  $\text{Ca}^{2+}$  can be detrimental for health. Elevated mitochondrial uptake increases  
29 mitochondrial reactive oxygen species (ROS) production and is associated with heart failure and ischemic  
30 brain injury (Santulli et al., 2015; Starkov et al., 2004). Reversely, mitochondrial ROS decreases if  $\text{Ca}^{2+}$  uptake  
31 to mitochondria is suppressed (Mallilankaraman et al., 2012; Tomar et al., 2016). Understanding of principles  
32 and mechanisms of organellar  $\text{Ca}^{2+}$  handling provides starting point to develop interventions in dysregulated  
33 calcium handling.

34 Peroxisomes are small intracellular organelles with a phospholipid bilayer membrane. In concert with  
35 evolutionarily conserved functions in lipid and ROS metabolism, peroxisomes are highly plastic and change in  
36 their number, morphology and content upon environmental stimuli (Smith and Aitchison, 2013).  
37 Communication of peroxisomes with other cellular compartments through exchange of ROS or lipid  
38 metabolites is essential for human health (Castro et al., 2018; Schrader et al., 2020; Wanders et al., 2015).  
39 Yet, peroxisomal  $\text{Ca}^{2+}$  has not been studied in excitable cells before, and there are contradicting data about  
40 the  $\text{Ca}^{2+}$  handling in peroxisomes and its dependence on cytosolic  $\text{Ca}^{2+}$  (Drago et al., 2008; Lasorsa et al.,  
41 2008). It has been suggested that peroxisomes are potential targets of  $\text{Ca}^{2+}$  signaling pathways that initiate  
42 outside of the peroxisome or serve as a cytosolic  $\text{Ca}^{2+}$  buffer, but peroxisomes may also take up  $\text{Ca}^{2+}$  due to  
43 their own need (Drago et al., 2008; Islinger et al., 2012).

44 Measurement of  $\text{Ca}^{2+}$  dynamics *in vivo* inside cellular organelles was driven by the development of  $\text{Ca}^{2+}$ -  
45 sensitive fluorescent proteins, also known as genetically encoded  $\text{Ca}^{2+}$  indicators (GECIs) (Gibhardt et al.,  
46 2016; Pozzan and Rudolf, 2009).  $\text{Ca}^{2+}$  dynamics was analysed in the ER, in mitochondria, the cytosol, and in  
47 lysosomes by using GECIs (McCue et al., 2013; Whitaker, 2010). GECIs have a  $\text{Ca}^{2+}$  binding domain, usually  
48 calmodulin (CaM). Ratiometric pericam is a single fluorophore-based GECI with circularly permuted EYFP  
49 (cpEYFP) as the fluorophore (Nagai et al., 2001). A special role among GECIs play chameleon-based sensors  
50 that use Förster resonance energy transfer (FRET). Here,  $\text{Ca}^{2+}$  results in a conformational change, that  
51 decreases the distance between donor (typically CFP) and acceptor (typically a YFP variant) so that FRET  
52 occurs (Gibhardt et al., 2016; Palmer and Tsien, 2006; Pérez Koldenkova and Nagai, 2013). The FRET/donor  
53 ratio (FRET ratio) correlates with the  $\text{Ca}^{2+}$  concentration (Figure 1A).

54 The possibility to generate human induced pluripotent stem cells (hiPSCs) from somatic cell sources and to  
55 direct their differentiation into almost any cell type make it possible to maintain and study human CMs in  
56 culture (Yoshida and Yamanaka, 2011).

57 This work combines the advantages of organelle-targeted GECIs and hiPSCs. We develop several peroxisomal  
58  $\text{Ca}^{2+}$  sensors, and we measure intraperoxisomal  $\text{Ca}^{2+}$  after pharmacological stimulation in non-excitable and  
59 excitable cells. We show that peroxisomes take up  $\text{Ca}^{2+}$  upon cytosolic  $\text{Ca}^{2+}$  increase both following ER  $\text{Ca}^{2+}$   
60 store depletion and  $\text{Ca}^{2+}$  entry to the cells through PM. We also demonstrate that peroxisomes take up  $\text{Ca}^{2+}$   
61 in rat CMs and hiPSC-CMs.

## 62 Results

### 63 Development and validation of $\text{Ca}^{2+}$ sensors for peroxisomal $\text{Ca}^{2+}$

64 To assess peroxisomal  $\text{Ca}^{2+}$ , we used three GECIs with different affinities to  $\text{Ca}^{2+}$ : D3cpV, D1cpV and pericam  
65 (Figure 1A, Table 1). The sensors were chosen to cover a wide range of  $K_d$  values to identify the most suitable  
66 GECI for intra-peroxisomal measurement. We preferred ratiometric sensors that allow measurements in two  
67 wavelengths. This enables direct interpretation of the acquired data by calculating the ratio of intensities at  
68 each time point. The ratios provide direct information about  $\text{Ca}^{2+}$  binding and are independent of the sensor  
69 concentration itself (Pérez Koldenkova and Nagai, 2013). For the direct comparison of cellular  
70 compartments, we used specific sensors for the cytosol (D3cpV, R-GECO1), mitochondria (4mtD3cpV), and  
71 peroxisomes (D3cpV-px, D1cpV-px, pericam-px) (Figure 1B).

72 D3cpV is a chameleon-type indicator based on FRET. The conformational change associated with the  $\text{Ca}^{2+}$   
73 binding to CaM leads to an increase in FRET efficiency and FRET ratio (Pérez Koldenkova and Nagai, 2013).

74 D3cpV has a  $K_d$  value of 0.6  $\mu\text{M}$  and a dynamic range of 5.0 (Palmer et al., 2006). D1cpV, in comparison, is a  
75 FRET sensor with a  $K_d$  value of 60  $\mu\text{M}$  (Palmer et al., 2004). Finally, pericam is a cpEYFP-based GECl with two  
76 excitation peaks at  $\sim 420$  nm and 505 nm (Nagai et al., 2001). In the presence of  $\text{Ca}^{2+}$ , a conformational  
77 change in the pericam structure shifts the excitation profile so that the 505/420 ratio increases and serves as  
78 a measure of  $\text{Ca}^{2+}$  concentration (Figure 1A). Pericam has a  $K_d$  value of 1.7  $\mu\text{M}$  and dynamic range of 10.

79 We added strong peroxisomal targeting signals of the PTS1 type to D3cpV, D1cpV, and pericam and tested  
80 their localization after transfection by co-staining with antibodies directed against the peroxisomal  
81 membrane protein PEX14. All constructs targeted to peroxisomes (Figure 1C).

82 To test in living cells if D3cpV-px senses  $\text{Ca}^{2+}$  in the peroxisome, we permeabilized cells by digitonin, washed  
83 out the cytosol, and added relatively high  $\text{Ca}^{2+}$  concentrations.  $\text{Ca}^{2+}$  addition resulted in drastic increase of  
84 FRET and a 1.5-fold increase in FRET ratio (Figure 1D). In order to further illustrate the increase of the FRET  
85 signal, we false-colored by using a color look-up table (LUT) the images recorded before and after  $\text{Ca}^{2+}$  the  
86 addition (Figure 1D).

87 When we performed the same type of experiment with D1cpV-px, FRET increased as well after  $\text{Ca}^{2+}$  addition,  
88 showing that the D1cpV-px construct is  $\text{Ca}^{2+}$  sensitive (Figure 1E). However, following the same stimulation  
89 protocol, the signal change of D1cpV-px was only 1.08-fold, and thus considerably smaller than with using  
90 D3cpV-px. Due to the low signal change we excluded D1cpV-px from the further experiments on peroxisomal  
91  $\text{Ca}^{2+}$ . Using pericam-px, the third peroxisome-targeted sensor in our experiments, high concentration of  $\text{Ca}^{2+}$   
92 addition after digitonin treatment resulted in 1.5-fold increase similar as for D3cpv-px (Figure 1F). Based on  
93 these results we decided to use D3cpv-px and pericam-px to evaluate  $\text{Ca}^{2+}$  dynamics in peroxisomes in  
94 further experiments.

95 To study possible mislocalisation or residual signal of peroxisomal  $\text{Ca}^{2+}$  sensors from the cytosol, we again  
96 analysed peroxisomal  $\text{Ca}^{2+}$  signals following digitonin stimulation of intact cells. In the case of mislocalisation  
97 of the sensor to cytosol the signal decrease after digitonin stimulation is expected. We first tested this in  
98 D3cpV-px (Figure 1G). There was no signal change observed, suggesting that D3cpV-px has no cytosolic  
99 mislocalisation. The cytosol washout also did not change the  $\text{Ca}^{2+}$  signal of the pericam-px before and after  
100 digitonin wash, suggesting that pericam-px, like D3cpV-px, is exclusively localized to the peroxisome (Figure  
101 1H).

## 102 **Measurement of peroxisomal $\text{Ca}^{2+}$ in non-excitabile cells**

103 We first aimed to compare the maximal possible response of cytosol and peroxisomes to  $\text{Ca}^{2+}$ . On that  
104 purpose, we used ionomycin as an ionophore. Ionomycin resulted in fast and immediate increase of cytosolic  
105 signal (Figure 2A). Peroxisomal signal increased also, yet, gradually. After reaching its maximum it decreased  
106 gradually and in 12 minutes almost returned to its starting values. The cytosolic reached its half maximal  
107 value in the same time with most significant decrease observed in the first two minutes after the maximum.  
108 This observations suggest that there could also be differences in  $\text{Ca}^{2+}$  handling also under near-physiological  
109 stimulation.

110 Based on the  $\text{Ca}^{2+}$  measurements in other organelles (Matsuda et al., 2013; Petrunaro et al., 2015; Suzuki et  
111 al., 2014; Zhao et al., 2011) we developed an experimental paradigm for peroxisome responses to the  
112 depletion and refilling of intracellular  $\text{Ca}^{2+}$  stores, specifically ER, in non-excitabile HeLa cells (Figure 2B). The  
113 stimulation of cell-surface localized G-protein coupled receptors by 100  $\mu\text{M}$  histamine results in the  
114 activation of phospholipase C cascade. Inositol 1,4,5-trisphosphate ( $\text{IP}_3$ ), the product of the cascade, binds to  
115 the  $\text{IP}_3$  receptor on the ER membrane, triggering  $\text{Ca}^{2+}$  store release. The cells are then exposed to 1 mM

116 extracellular  $\text{Ca}^{2+}$ , which leads to store-operated  $\text{Ca}^{2+}$  entry (SOCE) and a second  $\text{Ca}^{2+}$  elevation in the cytosol.  
117  $\text{Ca}^{2+}$  is constantly pumped back to the ER through sarcoplasmic/endoplasmic reticulum calcium ATPase  
118 (SERCA) (Clapham, 2007).

119 When we treated HeLa cells expressing D3cpV-px according to this protocol, we observed two peaks (Figure  
120 2C). Histamine addition resulted in a steep and fast increase of intraperoxisomal  $\text{Ca}^{2+}$  based on depletion of  
121 the ER. Addition of extracellular  $\text{Ca}^{2+}$  resulted in more gradual increase and gradual return to basal levels  
122 (Figure 2C).

123 Using the measurements with D3cpV-px and the known properties of the sensor, we calculated the absolute  
124  $\text{Ca}^{2+}$  concentration (Figure 2D) applying the formula described by Palmer and Tsien (2006). Under basal  
125 conditions,  $\text{Ca}^{2+}$  level in peroxisomes is around 400 nM and it rises upon near-physiological stimulation with  
126 histamine up to 1.8  $\mu\text{M}$   $\text{Ca}^{2+}$  (Figure 2E). The  $\text{Ca}^{2+}$  dynamics in peroxisomes measured with D3cpV-px was  
127 reproduced by pericam-px: a larger peak is observed after ER-store depletion and a smaller one after  
128 extracellular  $\text{Ca}^{2+}$  addition. The observed ratio curve from pericam-px largely resembles that from D3cpV-px.  
129 Since pericam has a  $K_d$  value of 1.7  $\mu\text{M}$  and covers higher  $\text{Ca}^{2+}$  concentrations, the observed result confirms  
130 the upper limit of peroxisomal  $\text{Ca}^{2+}$  and the range of  $\text{Ca}^{2+}$  between 0.4 and 1.8  $\mu\text{M}$  (Figure 2F). However,  
131 pericam is described as pH sensitive (Nagai et al., 2001), and since there is currently no consensus regarding  
132 pH levels in peroxisomes (Dansen et al., 2000; Jankowski et al., 2001; Waterham et al., 1990) we decided to  
133 perform all further experiments with D3cpV-px.

134 To confirm that the response in our experiments is due to the immediate increase in  $\text{Ca}^{2+}$  concentration, and  
135 to be able to directly compare peroxisomal  $\text{Ca}^{2+}$  handling with that of the cytosol, cells were co-transfected  
136 with D3cpV-px and the mApple-based cytosolic  $\text{Ca}^{2+}$  sensor R-GECO1, that increases in intensity when  
137 binding  $\text{Ca}^{2+}$  (Zhao et al., 2011). A large increase in the red signal from R-GECO1 was observed both upon ER  
138 store depletion and addition of extracellular  $\text{Ca}^{2+}$  (blue curve in Figure 2G). Although the GECIs used for the  
139 measurement in two compartments have different properties that can result in differences in their kinetics,  
140 peroxisomes largely follow the  $\text{Ca}^{2+}$  changes in the cytosol. Interestingly, there is little or no delay between  
141 signal increase in cytosol and peroxisomes, and the post-stimulation decline is more gradual and prolonged  
142 in peroxisomes compared to the cytosol, indicating the existence of a possible barrier or gate that can be  
143 saturated (Figure 2H).

144 To compare peroxisomal  $\text{Ca}^{2+}$  levels at rest and under stimulation with that of cytosol and mitochondria, cells  
145 were transfected with D3cpV sensors targeting specifically these compartments. FRET ratio was assessed as a  
146 direct indicator of  $\text{Ca}^{2+}$  concentration (Figure 2I-L). All three compartments showed two peaks: one after ER-  
147 store depletion with histamine, and another after extracellular  $\text{Ca}^{2+}$  addition and PM-based uptake (Figure  
148 2I).

149 The basal levels of calcium in mitochondria and peroxisomes detected with this sensor were comparable and  
150 significantly higher than that in the cytosol (typically  $\approx 100$  nM, Paupe and Prudent, 2018) in the current  
151 settings (Figure 2J). Furthermore, the increase of  $\text{Ca}^{2+}$  in peroxisomes upon intracellular store depletion with  
152 100  $\mu\text{M}$  histamine was significantly lower than the increase in the cytosol or mitochondria (Figure 2K),  
153 speaking against the hypothesis that peroxisomal  $\text{Ca}^{2+}$  is rising drastically upon stimulation as suggested  
154 before (Lasorsa et al., 2008). The addition of extracellular  $\text{Ca}^{2+}$  resulted in another peak in all three  
155 compartments (Figure 2L), evidencing that peroxisomes, like mitochondria depend on the PM-based uptake.  
156 Altogether, this suggests that peroxisomes tend to follow  $\text{Ca}^{2+}$  dynamics of the cytosol.

## 157 **Peroxisomal Ca<sup>2+</sup> measurement in cardiomyocytes**

158 We decided to test in neonatal rat cardiomyocytes (NRCMs) the hypothesis that Ca<sup>2+</sup> can access cardiac  
159 peroxisomes. NRCMs are primary cells with a well-developed T-tubule system and serve as a model for  
160 electrophysiological studies on CMs (Soeller and Cannell, 1999; Morad and Zhang, 2017).

161 We adapted the chemical stimulation protocol for the CMs by reducing it to a single stimulation, since the  
162 main source of Ca<sup>2+</sup> in these cells is the ER. We used thapsigargin (Tg) to chemically stimulate the CMs (Figure  
163 3A). Tg is a SERCA antagonist and blocks the constant repumping of Ca<sup>2+</sup> back to the ER, resulting in Ca<sup>2+</sup>  
164 accumulation in the cytosol. To avoid measurement distortion due to the spontaneous contractile activity of  
165 CMs, they were treated with 2,3-butanedione monoxime (BDM) (Gwathmey et al., 1991) before the  
166 experiment. As a proof of concept and for direct comparison, we performed the first round of measurements  
167 using the cytosol-localized Ca<sup>2+</sup>-sensor D3cpV (Figure 3B-D). A comparison between the Tg-treated cells with  
168 the buffer conditions (Figure 3B) demonstrated, as expected, no differences in the basal ratios (Figure 3C),  
169 but an increase of cytosolic Ca<sup>2+</sup> upon Tg addition (Figure 3D).

170 To measure peroxisomal Ca<sup>2+</sup> changes, we transfected NRCMs with D3cpV-px and compared Tg treatment  
171 with the untreated control group (Figure 3E). No offset of basal ratios between the two groups was present  
172 before treatment (Figure 3F). After the addition of the SERCA inhibitor, peroxisomal Ca<sup>2+</sup> increased,  
173 evidencing peroxisomal Ca<sup>2+</sup> uptake in NRCMs after store depletion (Figure 3G).

174 In the next set of experiments, we wanted to know if peroxisomes of human cardiac cells are able to take up  
175 Ca<sup>2+</sup>. To test this, human iPSCs created from fibroblasts of a healthy donor were differentiated into CMs  
176 using standardized protocols including cardiac mesoderm induction by subsequent activation and inhibition  
177 of the WNT pathway (Lian et al., 2013) and metabolic selection (Tohyama et al., 2013) (Figure 3H). Cardiac  
178 differentiation was tested for homogeneity by using the cardiac specific marker cardiac troponin T (cTNT)  
179 and analysis by flow cytometry at day 90 of differentiation. Our differentiation consisted of 90 %-95 % cTNT-  
180 positive cells (Figure 3I). Staining of hiPSC-CMs with antibodies against  $\alpha$ -actinin showed a regular sarcomeric  
181 striation pattern (Figure 3J).

182 As a proof of concept and for direct comparison, we measured cytosolic and peroxisomal Ca<sup>2+</sup> and compared  
183 Tg treatment with the addition of Ca<sup>2+</sup>-free buffer without Tg to the control cells (Figure 3K-P). Starting with  
184 the same basal ratios as the control samples (Figure 3K and 3L), Tg-treated cells showed a Ca<sup>2+</sup> increase after  
185 the treatment (Figure 3M).

186 After confirming that Tg can effectively deplete Ca<sup>2+</sup> stores in hiPSC-CMs, we measured peroxisomal Ca<sup>2+</sup> in  
187 these cells (Figure 3N). No ratio differences were present before Tg treatment (Figure 3O). Ca<sup>2+</sup>-store  
188 depletion resulted in an increase of peroxisomal Ca<sup>2+</sup>, confirming peroxisomal Ca<sup>2+</sup> uptake in hiPSC-CMs  
189 (Figure 3P).

190 To test whether Ca<sup>2+</sup> enters peroxisomes in a beat-to-beat manner in NRCMs, we field stimulated the cells  
191 with 1 Hz frequency (Figure 4A-D). The action potential depolarizes cell membrane resulting in the activation  
192 of voltage-gated Ca<sup>2+</sup> channels in T-tubules (Bootman et al., 2002; Chapman, 1979). As a result, initial minor  
193 amount of Ca<sup>2+</sup> enters the cell. It activates ryanodine receptors on the sarcoplasmic reticulum membrane,  
194 resulting into Ca<sup>2+</sup> release from the stores. Ca<sup>2+</sup>-induced Ca<sup>2+</sup> release from the stores enables cardiac muscle  
195 contraction. During relaxation SERCA and NCX (sodium-calcium exchanger) pump Ca<sup>2+</sup> back to the  
196 intracellular Ca<sup>2+</sup> stores and out of the cells (Clapham, 2007).

197 Under field stimulation, we observed rhythmical changes of  $\text{Ca}^{2+}$  level in the cytosol (Figure 4A). To quantify  
198 the amplitude of changes and link to the stimulation we performed fast Fourier transformation (FFT) of the  
199 data (Figure 4B). Signal amplitude oscillations in the cytosol were rhythmical and corresponded to the  
200 stimulation frequency (Figure 4B).

201 To test peroxisomal response to electrical stimulation, NRCMs expressing D3cpV-px were paced at a  
202 frequency of 1 Hz (Figure 4C). Oscillations observed were smaller in amplitude and appeared less regular  
203 than the cytosolic responses. To identify the frequency domain of these oscillations we performed FFT  
204 (Figure 4D). The extracted pattern showed amplitude changes at 1 Hz, suggesting that peroxisomes take up  
205  $\text{Ca}^{2+}$  in beat-to-beat manner.

206 Altogether, these results suggest that peroxisomes in both, rat and human cardiomyocytes were able to take  
207 up  $\text{Ca}^{2+}$  upon intracellular  $\text{Ca}^{2+}$ -store depletion and cytosolic  $\text{Ca}^{2+}$  increase.

## 208 Discussion

209 Peroxisomes are metabolically highly active organelles in need of communication with other cellular  
210 compartments (Sargsyan and Thoms, 2020). ROS signaling and homeostasis are central to the participation of  
211 peroxisomes in signaling pathways (Lismont et al., 2019). In the current work we focused on  $\text{Ca}^{2+}$  dynamics of  
212 peroxisomes as one of the major signaling molecules in the cell. We demonstrate that  $\text{Ca}^{2+}$  can enter  
213 peroxisomes of HeLa cells both when ER-stores are depleted and when cytosolic  $\text{Ca}^{2+}$  increases after  $\text{Ca}^{2+}$   
214 entry across the plasma membrane.

215 Two articles published in 2008 brought forth conflicting data on peroxisomal  $\text{Ca}^{2+}$ . According to Drago et al.  
216 (2008), the basal level of  $\text{Ca}^{2+}$  in peroxisomes equals the cytosolic  $\text{Ca}^{2+}$  level, whereas Lasorsa et al. (2008)  
217 find peroxisomal  $\text{Ca}^{2+}$  to be 20 times higher than in the cytosol. While Lasorsa et al. (2008) report rise of  
218 peroxisomal  $\text{Ca}^{2+}$  up to 100  $\mu\text{M}$  using an aequorin-based sensor, Drago et al. (2008) suggest slow increase  
219 when cytosolic  $\text{Ca}^{2+}$  rises. Each of the groups used a single yet different technique. These differences in the  
220 results can be partially attributed to the different measurement methods and the cell types used. Aequorin  
221 imaging requires long incubation times and cell population-based analysis that can be disadvantageous when  
222 measuring  $\text{Ca}^{2+}$  in intracellular organelles. In our experiments with HeLa cells, we found four-fold higher basal  
223 peroxisomal  $\text{Ca}^{2+}$  level compared to the cytosol and increase up to 1.8  $\mu\text{M}$  upon stimulation (Table 1). The  
224 range of the changes we report are based on the measurements with D3cpV-px and are supported by the  
225 measurement with pericam-px. Hence, we conclude that D3cpV-px can be used for measuring peroxisomal  
226  $\text{Ca}^{2+}$  concentration in a broad variety of cell types.

227 Electron microscopic experiments on rodent hearts performed in the 1970s show that peroxisomes are  
228 closely associated with T-tubules and with junctional sarcoplasmic reticulum (Hicks and Fahimi, 1977). The  
229 sarcoplasmic reticulum is an indispensable site for the excitation-contraction coupling and  $\text{Ca}^{2+}$  handling in  
230 myocytes (Flucher et al., 1994). The localization of peroxisomes to these sites raises the question if cardiac  
231 peroxisomes react to  $\text{Ca}^{2+}$  oscillations on a beat-to-beat basis, and/or if they can buffer calcium. HiPSC-CMs  
232 provide a wide spectrum of possibilities in cardiac research ranging from drug screening to cardiac  
233 regeneration (Yoshida and Yamanaka, 2011). In addition, these cells have been especially used to study  
234 patient-specific disease models including arrhythmic disorders and cardiomyopathies demonstrating a robust  
235 correlation to the predicted phenotype (Borchert et al., 2017; Liang et al., 2016; Streckfuss-Bömeke et al.,  
236 2017). We report here that  $\text{Ca}^{2+}$  is entering peroxisomes upon intracellular  $\text{Ca}^{2+}$ -store depletion in CMs. Since

237 intracellular store depletion is the main source of  $\text{Ca}^{2+}$  in CMs in the process of excitation-contraction  
238 coupling, it can be hypothesized that peroxisomes take up  $\text{Ca}^{2+}$  also on beat-to-beat manner in these cells.

239 Measurement of peroxisomal  $\text{Ca}^{2+}$  in CMs with FRET sensors in field stimulation suggests that peroxisomal  
240  $\text{Ca}^{2+}$  increases on beat-to-beat manner. This suggests that peroxisomes may participate in excitation-  
241 contraction processes. The exact role of peroxisomes here is the matter of future research. Furthermore, the  
242 experimental protocols developed here can be applied to study peroxisomal  $\text{Ca}^{2+}$  other cell types like  
243 neurons.

244 We found that basal peroxisomal  $\text{Ca}^{2+}$  levels are higher than cytosolic levels. There are two major ways of  
245 generating this  $\text{Ca}^{2+}$  gradient on the two sides of the membrane. One option could be the energy-dependant  
246 uptake mechanism, like SERCA for the ER (Clapham, 2007). We are, however, not aware of any data that can  
247 support this model. The second option may be locally high  $\text{Ca}^{2+}$  concentration at the entry side that would  
248 allow more direct channeling of  $\text{Ca}^{2+}$  (from the ER) into the peroxisomes resulting in relatively high  
249 peroxisomal  $\text{Ca}^{2+}$ . This second mechanism is known from the mitochondrial  $\text{Ca}^{2+}$  handling, where ER-  
250 mitochondria contact sites with tethering proteins generate microdomain with locally high  $\text{Ca}^{2+}$   
251 concentration (Hirabayashi et al., 2017). As a result,  $\text{Ca}^{2+}$  entry to mitochondria follows the  $\text{Ca}^{2+}$  gradient but  
252 mitochondrial  $\text{Ca}^{2+}$  is higher compared to cytosol. For the plausibility of the second option for peroxisomes  
253 speak the existance of ER-peroxisome contact sites (Costello et al., 2017; Hua et al., 2017). Therefore, we  
254 propose a hypothetical model of this mechanism, where most of the components are, however, yet  
255 unknown (Figure 5).

256 Although peroxisomal  $\text{Ca}^{2+}$  levels are higher than cytosolic  $\text{Ca}^{2+}$  levels, peroxisomes are unlikely to store  
257 significant amounts of  $\text{Ca}^{2+}$  under normal conditions, and they themselves take up  $\text{Ca}^{2+}$  when intracellular  
258 stores are depleted. Under specific conditions, like apoptosis or oxidative stress, the situation may change,  
259 however. We show that the rise of peroxisomal  $\text{Ca}^{2+}$  after histamine stimulation is not delayed and largely  
260 follows the cytosolic  $\text{Ca}^{2+}$ . Though there could be a delay due to the binding and conformational changes of  
261 GECs needed before the detection of the increase of the FRET signal, the range of this delay is less than  
262 milliseconds and cannot be seen in the experiments described here. We conclude that peroxisomes respond  
263 to cytosolic  $\text{Ca}^{2+}$  since we only found concordant changes of  $\text{Ca}^{2+}$  concentration in these two compartments.

264 The question of the cellular function and potential targets of peroxisomal  $\text{Ca}^{2+}$  is still open. One of the roles of  
265  $\text{Ca}^{2+}$  could be the regulation of peroxisomal processes. On the other hand, metabolic processes themselves  
266 may regulate  $\text{Ca}^{2+}$  uptake to organelles, as known from mitochondria (Nemani et al., 2020). Whether there is  
267 a mutual regulation of metabolic pathways or ROS production localised to peroxisomes is not known. Some  
268 plant but not mammalian catalases bind  $\text{Ca}^{2+}$  (Yang and Poovaiah, 2002). Currently, there are no peroxisomal  
269 processes known in mammals that would depend on  $\text{Ca}^{2+}$ . Peroxisomes, however, could serve as an  
270 additional cytosolic buffer for  $\text{Ca}^{2+}$  to take up an excess of cytosolic  $\text{Ca}^{2+}$  and release it slowly. Based on the  
271 findings of this study that the  $\text{Ca}^{2+}$  concentration in the peroxisome is higher than in the cytosol, it could be  
272 that peroxisomes may also serve as additional  $\text{Ca}^{2+}$  source for the cytosol in extreme situations.

## 273 **Methods**

### 274 **DNA constructs**

275 D3cpV-px (PST 1738) was generated from (pcDNA-)D3cpV (kind gift from A. Palmer and R. Tsien (Palmer et  
276 al., 2006) (Addgene #36323)) by amplifying an insert with OST 1599 (GCGCATCGAT GGTGATGGCC  
277 AAGTAACTA TGAAGAG) and OST 1600 (GCGCGAATTC TTAGAGCTTC GATTTCAGAC TTCCTCGA) primers. The  
278 product was then reinserted into D3cpV using Clal and EcoRI restriction sites. (pcDNA-)4mtD3cpV was a kind  
279 gift from A. Palmer and R. Tsien (Palmer et al., 2006) (Addgene #36324). D1cpV-px (PST 2169) was generated  
280 from the (pcDNA-) D1cpV (Palmer et al., 2004) (Addgene #37479) by amplifying an insert with  
281 oligonucleotide OST 2003 (GCGCGATCC CATGGTGAGC AAGGGC) and OST 2002 (CGCGGAATTC TTAGAGCTTC  
282 GATTTCAGAC TTCCTATGAC AGGCTCGATG TTGTGGCGGA TCTGAAGTT). The product was then reinserted  
283 into D1cpV using EcoRI and BamHI restriction sites. Pericam-px (PST 2170) was generated from ratiometric-  
284 pericam (for mitochondria) (Nagai et al., 2001) by amplifying an insert with OST 2116 (GCGCAAGCTT  
285 ATGAAGAGGCGC TGAAGAAAA) and OST 2117b (GCGCGAATTC CTAGAGCTTC GATTTCAGAC TTCCTATGAC  
286 AGGCTTTGCT GTCATCATTT GTACAACT), which was then re-inserted into ratiometric-pericam using EcoRI  
287 and HindIII restriction sites. (CMV-)R-GECO1 was a kind gift from R. Campbell (Zhao et al., 2011).

### 288 **Cells, cell culture and immunofluorescence**

289 HeLa cells were cultured in low glucose Dulbecco's Modified Eagle Medium (DMEM) medium (Biochrom)  
290 supplemented with 1% Pen/Strep (100units/ml Penicillin and 100 $\mu$ g/ml Streptomycin), 1% (w/v) glutamine  
291 and 10% (v/v) Fetal Calf Serum (FCS) in 5% CO<sub>2</sub> at 37 $\square$ C. For immunofluorescent detection of PEX14, cells  
292 were fixed with 4% paraformaldehyde for 20 min, and permeabilized using 0.5% Triton X-100 in PBS for 5  
293 min. After blocking for 30 min with 10% BSA in PBS (blocking buffer) at 37 $\square$ C, antigens were labelled with  
294 primary antibodies at 37 $\square$ C for 1 h. Rabbit anti-PEX14 (ProteinTech) primary antibody dilution in blocking  
295 buffer was 1:500. Labeling with the secondary antibodies conjugated to Cy3 (Life Technologies) was done for  
296 1 h (1:500). Coverslips were mounted with ProLong Gold mounting medium with or without DAPI (Thermo  
297 Fisher Scientific).

298 NRCMs were isolated from newborn rats. Briefly, after the rats were sacrificed hearts were removed from  
299 the thoracic cavity, homogenized mechanically and digested in 1mg/ml collagenase type II containing calcium  
300 and magnesium-free PBS at 37 $\square$ C with magnetic stirring. Supernatant was taken every 20 min and transferred  
301 to DMEM medium supplemented with Glutamax (Thermo Fisher Scientific), FCS and 1% Pen/Strep. Cells  
302 were then centrifuged, the cell pellet resuspended in fresh medium and transferred to a Petri dish for 45 min  
303 (37 $\square$ C and 5% CO<sub>2</sub>). The fibroblasts adhered and NRCMs remained in the supernatant. NRCMs were then  
304 seeded on glass cover slips covered by Geltrex (Thermo Fisher Scientific).

305 Cells and cardiac differentiation of hiPSCs were described earlier (Borchert et al., 2017). Cells were studied 90  
306 days after initiation of differentiation. Following differentiation, purity of hiPSC-CMs was determined by flow  
307 analysis (>90% cardiac TNT<sup>+</sup>) or by morphology (Borchert et al., 2017). HiPSC-CMs were maintained in RPMI  
308 1640 supplemented with Glutamax, HEPES and B27 supplement.

### 309 **Ca<sup>2+</sup> measurements**

310 Cells (200,000 for HeLa and hiPSC-CMs and 500,000 for NRCMs) were seeded on glass cover slips and  
311 transfected with sensor plasmids using Effectene (Qiagen) (HeLa) or Lipofectamine LTX Reagent (Thermo  
312 Fisher Scientific) (hiPSC-CMs and NRCMs) according to the manufacturer's instructions. Cells were imaged  
313 using a Zeiss Observer D1 (equipped with Zeiss Colibri 2 and Evolve 512 Delta EMCCD acquisition camera) or  
314 Axio Observer Z1 (equipped Zeiss Colibri 7, Definite Focus.2 and Zeiss AxioCam 702) with 40 $\times$  oil Fluar (N.A.  
315 1.3) objective at 37 $\square$ C in a Ca<sup>2+</sup>-free imaging buffer (145 mM NaCl, 4 mM KCl, 10 mM HEPES, 10 mM glucose,



316 2 mM MgCl<sub>2</sub>, 1 mM EGTA, pH 7.4 at 37°C) 24 hours (HeLa and NRCMs) or 48 hours (hiPSC-CMs) after  
317 transfection. Where indicated, NRCMs were field-stimulated at 1 Hz with MyoPacer ES (IonOptix). Data were  
318 analyzed with AxioVision (Zeiss) and ZEN (Zeiss) software. Background and bleed-through (BT) were  
319 corrected in the FRET/donor ratio:

$$\frac{FRET}{donor} = \frac{(FRET - background) - [(CFP - background) \times BT] - [(YFP - background) \times BT]}{CFP - background}$$

320 Excitation 420 nm and 505 nm with emission filters 483 ± 16 nm and 542 ± 14 nm, or excitation 438 ± 12 nm  
321 and 508 ± 11 nm with emission filters 479 ± 20 nm and 544 ± 14 nm were used. Where indicated, the  
322 concentration of Ca<sup>2+</sup> in the imaging buffer was increased to 1 mM by doubling the buffer volume to the cells  
323 (e.g. during treatment with chemicals) by the addition of Ca<sup>2+</sup>-containing buffer (imaging buffer that contains  
324 2 mM CaCl<sub>2</sub> (pH 7.4, 37°C) instead of EGTA). HiPSC-CMs and NRCMs were incubated in 10 mM 2,3-  
325 butanedione monoxime (BDM) before the measurements. FRET ratios (calculated as FRET donor ratio) were  
326 calculated by subtracting the background intensity and correcting for crosstalk. ER-store depletion in the  
327 cells was induced by 100 μM histamine (HeLa) in Ca<sup>2+</sup>-free buffer or 1 μM Tg in Ca<sup>2+</sup>-containing buffer. For  
328 permeabilization, cells were treated with 0.01% digitonin in Ca<sup>2+</sup>-free EGTA buffer for 50 sec to 1 min and  
329 cytosol was washed out by rinsing twice with Ca<sup>2+</sup>-free EGTA buffer. Cell response to ionomycin was  
330 measured by the addition of 5 μM ionomycin in 10 mM Ca<sup>2+</sup>-containing buffer. Images for color LUT were  
331 made by applying Royal LUT on difference image of FRET and CFP in case of D3cpV-px and D1cpV-px, or  
332 difference image of 505 nm and 420 nm in case of pericam-px.

### 333 Statistical analysis

334 Statistical significance was assessed using two-sided unpaired student's t-test when comparing two groups,  
335 or one-way ANOVA followed by Tukey's post hoc test when three groups were compared. Data were  
336 presented as Tukey's box plots: the box is limited by 25<sup>th</sup> and 75<sup>th</sup> percentiles. Data points larger than 75<sup>th</sup>  
337 percentile plus 1.5IQR (interquartile range) or smaller than 25<sup>th</sup> percentile minus 1.5IQR are presented as  
338 outliers. All other data are covered by the whiskers.

### 339 References

- 340 Bassani, R. A., Bassani, J. W., and Bers, D. M. (1992). Mitochondrial and sarcolemmal Ca<sup>2+</sup> transport reduce [Ca<sup>2+</sup>]<sub>i</sub>  
341 during caffeine contractures in rabbit cardiac myocytes. *J. Physiol.* 453, 591–608.
- 342 Bootman, M. D., Berridge, M. J., and Roderick, H. L. (2002). Calcium Signalling: More Messengers, More Channels, More  
343 Complexity. *Curr. Biol.* 12, R563–R565. doi:10.1016/S0960-9822(02)01055-2.
- 344 Borchert, T., Hübscher, D., Guessoum, C. I., Lam, T.-D. D., Ghadri, J. R., Schellinger, I. N., et al. (2017). Catecholamine-  
345 Dependent β-Adrenergic Signaling in a Pluripotent Stem Cell Model of Takotsubo Cardiomyopathy. *J. Am. Coll.*  
346 *Cardiol.* 70, 975–991. doi:10.1016/j.jacc.2017.06.061.
- 347 Castro, I. G., Schuldiner, M., and Zalckvar, E. (2018). Mind the organelle gap - Peroxisome contact sites in disease.  
348 *Trends Biochem. Sci.* 43, 199–210. doi:10.1016/j.tibs.2018.01.001.
- 349 Chapman, R. A. (1979). Excitation-contraction coupling in cardiac muscle. *Prog. Biophys. Mol. Biol.* 35, 1–52.  
350 doi:10.1016/0079-6107(80)90002-4.
- 351 Clapham, D. E. (2007). Calcium Signaling. *Cell* 131, 1047–1058. doi:10.1016/j.cell.2007.11.028.
- 352 Dansen, T. B., Wirtz, K. W. A., Wanders, R. J. A., and Pap, E. H. W. (2000). Peroxisomes in human fibroblasts have a basic  
353 pH. *Nat. Cell Biol.* 2, 51–53. doi:10.1038/71375.
- 354 Drago, I., Giacomello, M., Pizzo, P., and Pozzan, T. (2008). Calcium dynamics in the peroxisomal lumen of living cells. *J.*  
355 *Biol. Chem.* 283, 14384–14390. doi:10.1074/jbc.M800600200.

- 356 Flucher, B. E., Andrews, S. B., and Daniels, M. P. (1994). Molecular organization of transverse tubule/sarcoplasmic  
357 reticulum junctions during development of excitation-contraction coupling in skeletal muscle. *Mol. Biol. Cell* 5,  
358 1105–1118.
- 359 Gibhardt, C. S., Zimmermann, K. M., Zhang, X., Belousov, V. V., and Bogeski, I. (2016). Imaging calcium and redox signals  
360 using genetically encoded fluorescent indicators. *Cell Calcium* 60, 55–64. doi:10.1016/j.ceca.2016.04.008.
- 361 Greotti, E., Wong, A., Pozzan, T., Penden, D., and Pizzo, P. (2016). Characterization of the ER-Targeted Low Affinity Ca<sup>2+</sup>  
362 Probe D4ER. *Sensors* 16, 1419. doi:10.3390/s16091419.
- 363 Gwathmey, J. K., Hajjar, R. J., and Solaro, R. J. (1991). Contractile deactivation and uncoupling of crossbridges. Effects of  
364 2,3-butanedione monoxime on mammalian myocardium. *Circ. Res.* 69, 1280–1292.  
365 doi:10.1161/01.res.69.5.1280.
- 366 Hicks, L., and Fahimi, H. D. (1977). Peroxisomes (microbodies) in the myocardium of rodents and primates. *Cell Tissue*  
367 *Res.* 175, 467–481. doi:10.1007/BF00222413.
- 368 Islinger, M., Grille, S., Fahimi, H. D., and Schrader, M. (2012). The peroxisome: an update on mysteries. *Histochem. Cell*  
369 *Biol.* 137, 547–574. doi:10.1007/s00418-012-0941-4.
- 370 Jankowski, A., Kim, J. H., Collins, R. F., Daneman, R., Walton, P., and Grinstein, S. (2001). In Situ Measurements of the pH  
371 of Mammalian Peroxisomes Using the Fluorescent Protein pHluorin. *J. Biol. Chem.* 276, 48748–48753.  
372 doi:10.1074/jbc.M109003200.
- 373 Lasorsa, F. M., Pinton, P., Palmieri, L., Scarcia, P., Rottensteiner, H., Rizzuto, R., et al. (2008). Peroxisomes as Novel  
374 Players in Cell Calcium Homeostasis. *J. Biol. Chem.* 283, 15300–15308. doi:10.1074/jbc.M800648200.
- 375 Lian, X., Zhang, J., Azarin, S. M., Zhu, K., Hazeltine, L. B., Bao, X., et al. (2013). Directed cardiomyocyte differentiation  
376 from human pluripotent stem cells by modulating Wnt/ $\beta$ -catenin signaling under fully defined conditions. *Nat.*  
377 *Protoc.* 8, 162–175. doi:10.1038/nprot.2012.150.
- 378 Liang, P., Sallam, K., Wu, H., Li, Y., Itzhaki, I., Garg, P., et al. (2016). Patient-Specific and Genome-Edited Induced  
379 Pluripotent Stem Cell-Derived Cardiomyocytes Elucidate Single-Cell Phenotype of Brugada Syndrome. *J. Am.*  
380 *Coll. Cardiol.* 68, 2086–2096. doi:10.1016/j.jacc.2016.07.779.
- 381 Lismont, C., Revenco, I., and Fransen, M. (2019). Peroxisomal Hydrogen Peroxide Metabolism and Signaling in Health  
382 and Disease. *Int. J. Mol. Sci.* 20, 3673. doi:10.3390/ijms20153673.
- 383 Matsuda, T., Horikawa, K., Saito, K., and Nagai, T. (2013). Highlighted Ca<sup>2+</sup> imaging with a genetically encoded ‘caged’  
384 indicator. *Sci. Rep.* 3, 1–4. doi:10.1038/srep01398.
- 385 McCue, H. V., Wardyn, J. D., Burgoyne, R. D., and Haynes, L. P. (2013). Generation and characterization of a lysosomally  
386 targeted, genetically encoded Ca<sup>2+</sup>-sensor. *Biochem. J.* 449, 449–457. doi:10.1042/BJ20120898.
- 387 Morad, M., and Zhang, X.-H. (2017). Mechanisms of spontaneous pacing: sinoatrial nodal cells, neonatal  
388 cardiomyocytes, and human stem cell derived cardiomyocytes. *Can. J. Physiol. Pharmacol.* 95, 1100–1107.  
389 doi:10.1139/cjpp-2016-0743.
- 390 Nagai, T., Sawano, A., Park, E. S., and Miyawaki, A. (2001). Circularly permuted green fluorescent proteins engineered to  
391 sense Ca<sup>2+</sup>. *Proc. Natl. Acad. Sci. U. S. A.* 98, 3197–3202. doi:10.1073/pnas.051636098.
- 392 Palmer, A. E., Giacomello, M., Kortemme, T., Hires, S. A., Lev-Ram, V., Baker, D., et al. (2006). Ca<sup>2+</sup> Indicators Based on  
393 Computationally Redesigned Calmodulin-Peptide Pairs. *Chem. Biol.* 13, 521–530.  
394 doi:10.1016/j.chembiol.2006.03.007.
- 395 Palmer, A. E., Jin, C., Reed, J. C., and Tsien, R. Y. (2004). Bcl-2-mediated alterations in endoplasmic reticulum Ca<sup>2+</sup>  
396 analyzed with an improved genetically encoded fluorescent sensor. *Proc. Natl. Acad. Sci. U. S. A.* 101, 17404–  
397 17409. doi:10.1073/pnas.0408030101.
- 398 Palmer, A. E., and Tsien, R. Y. (2006). Measuring calcium signaling using genetically targetable fluorescent indicators.  
399 *Nat. Protoc.* 1, 1057–1065. doi:10.1038/nprot.2006.172.
- 400 Paupe, V., and Prudent, J. (2018). New insights into the role of mitochondrial calcium homeostasis in cell migration.  
401 *Biochem. Biophys. Res. Commun.* 500, 75–86. doi:10.1016/j.bbrc.2017.05.039.

- 402 Pérez Koldenkova, V., and Nagai, T. (2013). Genetically encoded Ca(2+) indicators: properties and evaluation. *Biochim.*  
403 *Biophys. Acta* 1833, 1787–1797. doi:10.1016/j.bbamcr.2013.01.011.
- 404 Petrungraro, C., Zimmermann, K. M., Küttner, V., Fischer, M., Dengjel, J., Bogeski, I., et al. (2015). The Ca(2+)-Dependent  
405 Release of the Mia40-Induced MICU1-MICU2 Dimer from MCU Regulates Mitochondrial Ca(2+) Uptake. *Cell*  
406 *Metab.* 22, 721–733. doi:10.1016/j.cmet.2015.08.019.
- 407 Pozzan, T., and Rudolf, R. (2009). Measurements of mitochondrial calcium in vivo. *Biochim. Biophys. Acta BBA -*  
408 *Bioenerg.* 1787, 1317–1323. doi:10.1016/j.bbabi.2008.11.012.
- 409 Santulli, G., Xie, W., Reiken, S. R., and Marks, A. R. (2015). Mitochondrial calcium overload is a key determinant in heart  
410 failure. *Proc. Natl. Acad. Sci. U. S. A.* 112, 11389–11394. doi:10.1073/pnas.1513047112.
- 411 Sargsyan, Y., and Thoms, S. (2020). Staying in Healthy Contact: How Peroxisomes Interact with Other Cell Organelles.  
412 *Trends Mol. Med.* 26, 201–214. doi:10.1016/j.molmed.2019.09.012.
- 413 Schrader, M., Kamoshita, M., and Islinger, M. (2020). Organelle interplay-peroxisome interactions in health and disease.  
414 *J. Inher. Metab. Dis.* 43, 71–89. doi:10.1002/jimd.12083.
- 415 Smith, J. J., and Aitchison, J. D. (2013). Peroxisomes take shape. *Nat. Rev. Mol. Cell Biol.* 14, 803–817.  
416 doi:10.1038/nrm3700.
- 417 Soeller C., and Cannell M. B. (1999). Examination of the Transverse Tubular System in Living Cardiac Rat Myocytes by 2-  
418 Photon Microscopy and Digital Image-Processing Techniques. *Circ. Res.* 84, 266–275.  
419 doi:10.1161/01.RES.84.3.266.
- 420 Starkov, A. A., Chinopoulos, C., and Fiskum, G. (2004). Mitochondrial calcium and oxidative stress as mediators of  
421 ischemic brain injury. *Cell Calcium* 36, 257–264. doi:10.1016/j.ceca.2004.02.012.
- 422 Streb, H., Irvine, R. F., Berridge, M. J., and Schulz, I. (1983). Release of Ca<sup>2+</sup> from a nonmitochondrial intracellular store  
423 in pancreatic acinar cells by inositol-1,4,5-trisphosphate. *Nature* 306, 67–69. doi:10.1038/306067a0.
- 424 Streckfuss-Bömeke, K., Tiburcy, M., Fomin, A., Luo, X., Li, W., Fischer, C., et al. (2017). Severe DCM phenotype of patient  
425 harboring RBM20 mutation S635A can be modeled by patient-specific induced pluripotent stem cell-derived  
426 cardiomyocytes. *J. Mol. Cell. Cardiol.* 113, 9–21. doi:10.1016/j.yjmcc.2017.09.008.
- 427 Suzuki, J., Kanemaru, K., Ishii, K., Ohkura, M., Okubo, Y., and Iino, M. (2014). Imaging intraorganellar Ca<sup>2+</sup> at subcellular  
428 resolution using CEPIA. *Nat. Commun.* 5, 1–13. doi:10.1038/ncomms5153.
- 429 Tohyama, S., Hattori, F., Sano, M., Hishiki, T., Nagahata, Y., Matsuura, T., et al. (2013). Distinct metabolic flow enables  
430 large-scale purification of mouse and human pluripotent stem cell-derived cardiomyocytes. *Cell Stem Cell* 12,  
431 127–137. doi:10.1016/j.stem.2012.09.013.
- 432 Wanders, R. J. A., Waterham, H. R., and Ferdinandusse, S. (2015). Metabolic Interplay between Peroxisomes and Other  
433 Subcellular Organelles Including Mitochondria and the Endoplasmic Reticulum. *Front. Cell Dev. Biol.* 3, 83.  
434 doi:10.3389/fcell.2015.00083.
- 435 Waterham, H. R., Keizer-Gunnink, I., Goodman, J. M., Harder, W., and Veenhuis, M. (1990). Immunocytochemical  
436 evidence for the acidic nature of peroxisomes in methylotrophic yeasts. *FEBS Lett.* 262, 17–19.  
437 doi:10.1016/0014-5793(90)80142-6.
- 438 Whitaker, M. (2010). Genetically-encoded probes for measurement of intracellular calcium. *Methods Cell Biol.* 99, 153–  
439 182. doi:10.1016/B978-0-12-374841-6.00006-2.
- 440 Williams, G. S. B., Boyman, L., and Lederer, W. J. (2015). Mitochondrial calcium and the regulation of metabolism in the  
441 heart. *J. Mol. Cell. Cardiol.* 78, 35–45. doi:10.1016/j.yjmcc.2014.10.019.
- 442 Yang, T., and Poovaiah, B. W. (2002). Hydrogen peroxide homeostasis: Activation of plant catalase by  
443 calcium/calmodulin. *Proc. Natl. Acad. Sci. U. S. A.* 99, 4097–4102. doi:10.1073/pnas.052564899.
- 444 Yoshida, Y., and Yamanaka, S. (2011). iPS cells: a source of cardiac regeneration. *J. Mol. Cell. Cardiol.* 50, 327–332.  
445 doi:10.1016/j.yjmcc.2010.10.026.
- 446 Zhao, Y., Araki, S., Wu, J., Teramoto, T., Chang, Y.-F., Nakano, M., et al. (2011). An expanded palette of genetically  
447 encoded Ca<sup>2+</sup> indicators. *Science* 333, 1888–1891. doi:10.1126/science.1208592.

448 **Author Contributions**

449 ST conceived and designed the study. YS performed most experiments, conducted data analysis and  
450 prepared all figures. UB tested D3cpV-px localization, and measured  $\text{Ca}^{2+}$  in NRCMs and hiPSC-CMs. IB  
451 supervised  $\text{Ca}^{2+}$  measurements and provided access to the Zeiss Cell Observer Z1 with Colibri3 LED system.  
452 KSB provided hiPSC-CMs and contributed to manuscript writing. YS and ST wrote the manuscript. All authors  
453 read, revised and approved the manuscript.

454 **Funding**

455 This project was supported by grants from the Deutsche Forschungsgemeinschaft TH 1538/3-1 to ST, the  
456 Collaborate Research Council 'Modulatory units in heart failure' SFB 1002/2 TP A10 to ST and SFB1190 TP17  
457 and SFB1027 TP C4 to IB, the MWK/VW foundation Project 131260 /ZN2921 to ST, the Horst and Eva-Luise  
458 Köhler Foundation to ST, the Fritz Thyssen Foundation Az 10.19.2.026MN to KSB, and a PhD stipend by the  
459 DAAD program 57381412 ID 91572398 to YS.

460 **Acknowledgments**

461 We thank Drs. Robert Campbell, Takeharu Nagai, and Nicolas Demaurex for providing GECO and pericam  
462 plasmids. We thank Julia Hofhuis for earlier work on peroxisomal calcium and for cloning of D3cpV-px and  
463 Xin Zhang for support with microscopy.

464 **FIGURES**

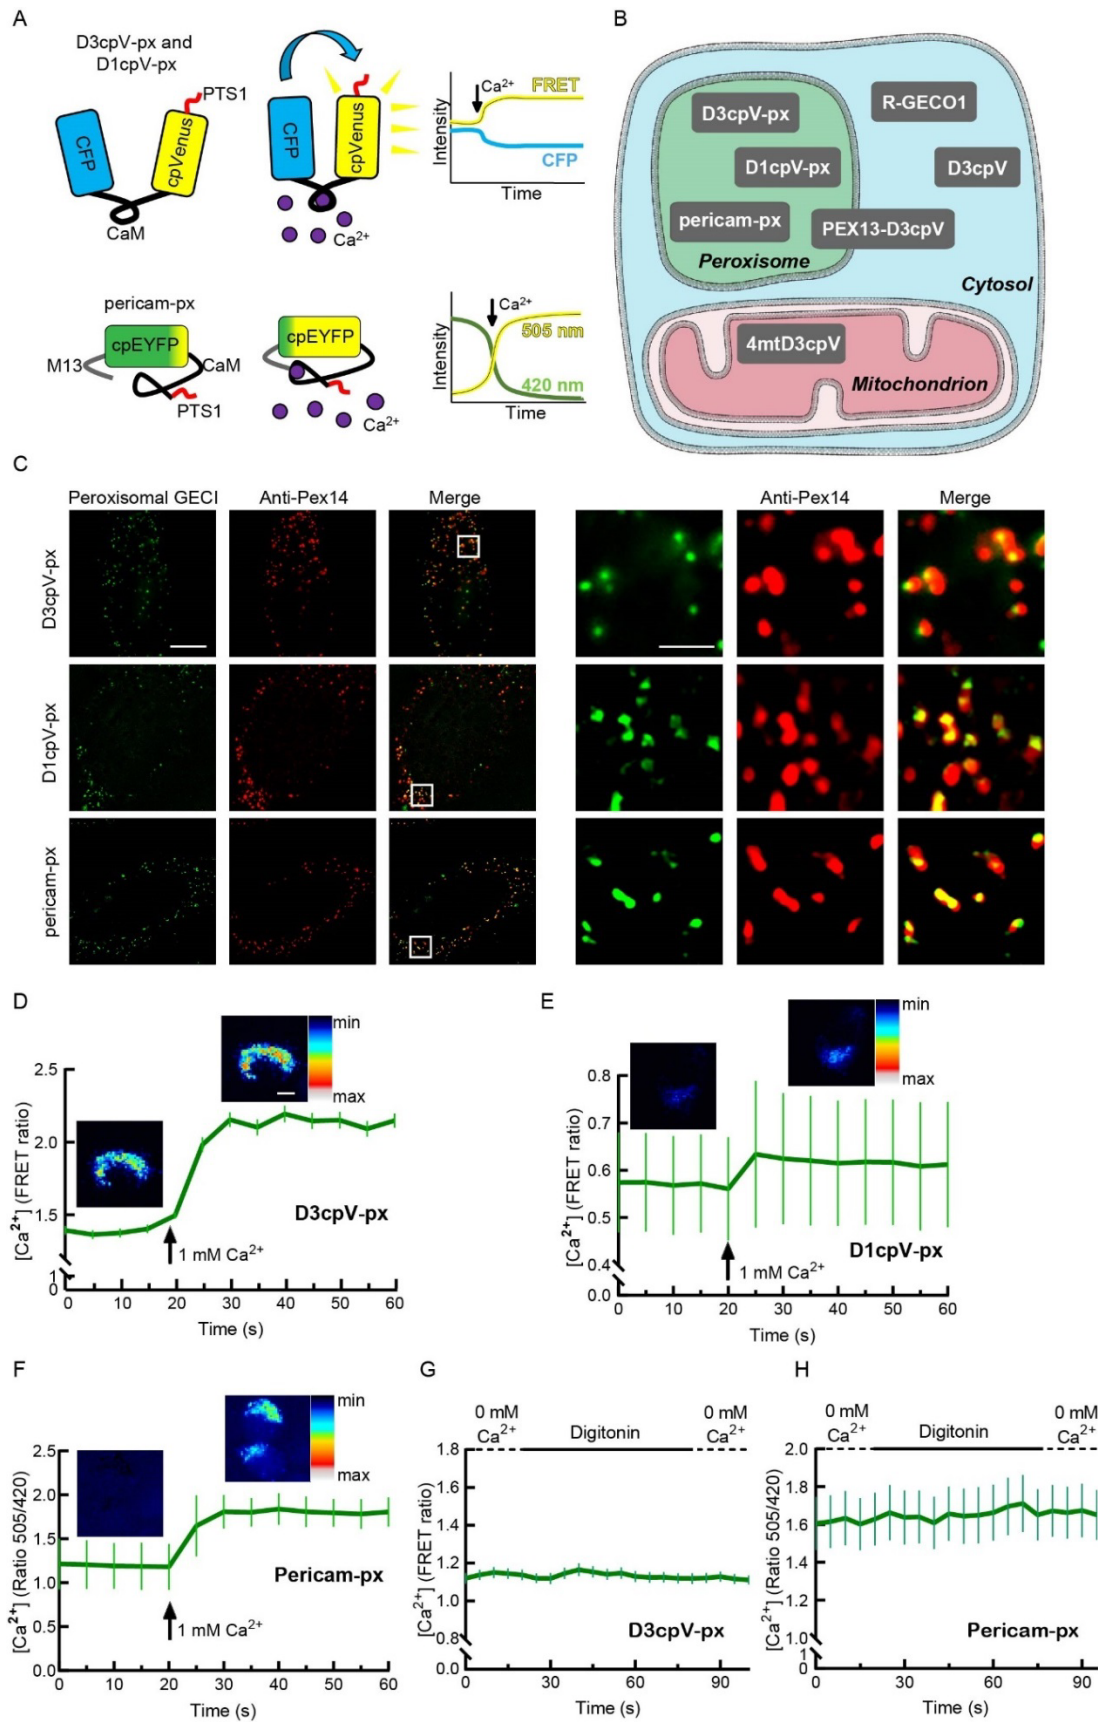

466 **Figure 1: New sensors for peroxisomal Ca<sup>2+</sup>.** (A) Genetically encoded calcium indicators (GECIs) targeted to  
467 peroxisomes. D3cpv-px and D1cpV-px are FRET sensors with modified CaM sites. Pericam-px is a single-  
468 fluorophore based GECI that has M13 and CaM as Ca<sup>2+</sup> binding sites. In the absence of Ca<sup>2+</sup>, the emission  
469 measured when the sensor is excited with 420 nm is higher than when excited with 505 nm. The ratio  
470 505/420 is a measure for the Ca<sup>2+</sup> concentration. (B) Subcellular localization of GECIs used in this study. (C)  
471 Peroxisomal GECIs colocalize with the peroxisomal membrane marker PEX14. HeLa cells were transfected  
472 with the GECIs and stained with anti-PEX14 antibodies. The images in the left part of the panel show one cell  
473 each (scale bar 10 μm). The cropped areas are marked and magnified in the right part of the panel (scale bar  
474 2 μm). (D-F) D3cpv-px, D1cpv-px, and pericam-px are Ca<sup>2+</sup> sensitive. Images false-colored with LUT show  
475 representative cells before (left) and after (right) Ca<sup>2+</sup> addition. Curves presented as mean ± SEM. Scale bar:  
476 10 μm. (D) Addition of 1 mM Ca<sup>2+</sup> to D3cpV-px expressing cells results in 1.5-fold FRET ratio increase, n = 60  
477 cells from three independent experiments. (E) FRET ratio increases 1.08 times when 1 mM Ca<sup>2+</sup> is added to  
478 D1cpv-px expressing cells, n = 33 cells from three experiments. (F) Ca<sup>2+</sup> addition leads to 1.5-fold increase in  
479 505/420 ratio with Pericam-px, n = 75 cells from three experiments. (G) Measurement of D3cpV-px during  
480 cytosol washout. No change in signal is detected. (H) Measurement of pericam-px during cytosol washout.  
481 No difference of signal before and after cytosol washout is detected, n = 43 cells for D3cpV-px in (G) and n =  
482 45 cells for pericam-px in (H).

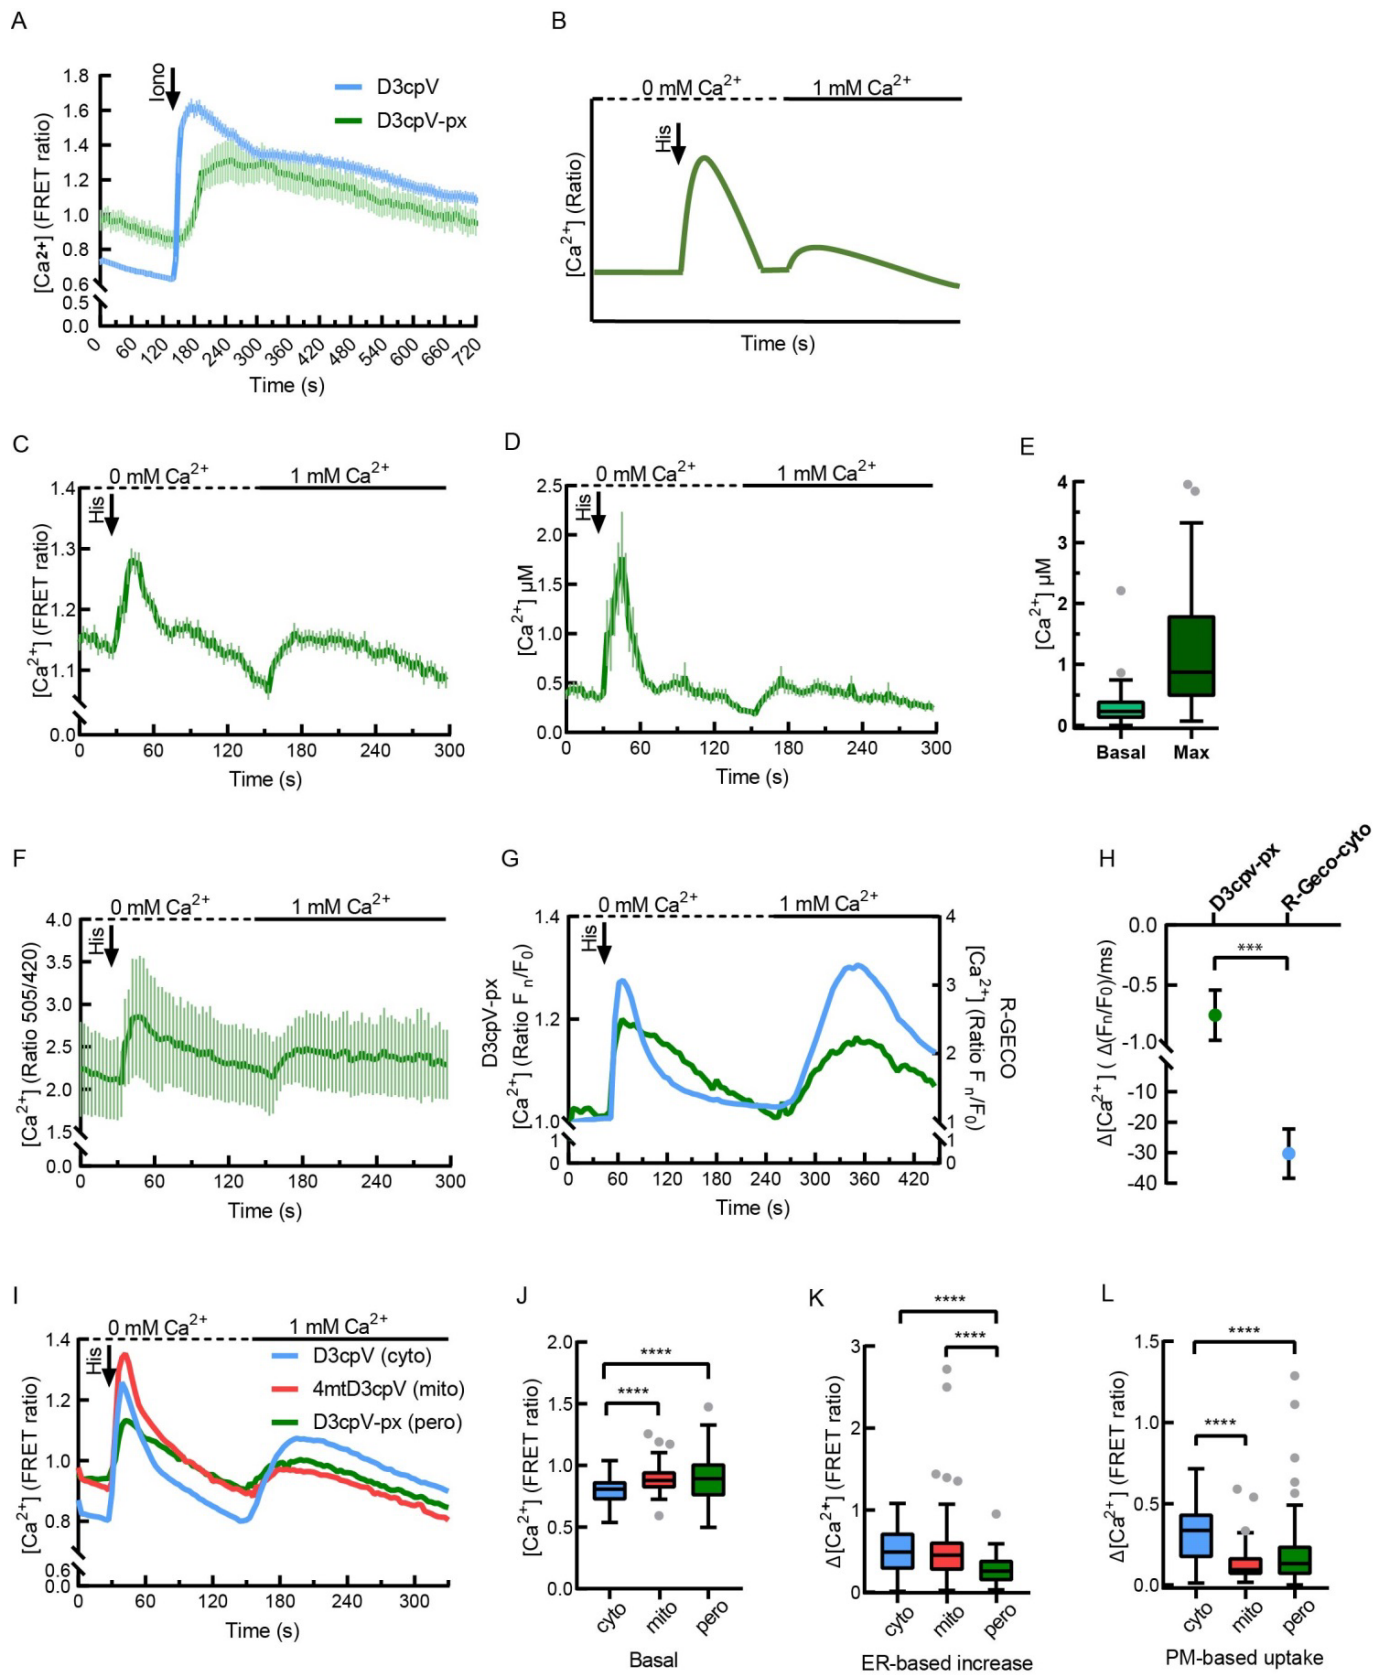

484 **Figure 2: Measurement of peroxisomal  $\text{Ca}^{2+}$  in HeLa cells.** (A) Comparison of cytosolic and peroxisomal  
485 responses to ionomycin (Iono). In comparison to cytosol, peroxisomal signal increases gradually,  $n = 16$  cells  
486 for D3cpV and  $n = 9$  cells for D3cpV-px. (B) Experimental paradigm of a two-step  $\text{Ca}^{2+}$  measurement in non-  
487 excitable cells. 1<sup>st</sup> peak after histamine (His) addition: ER-store depletion. 2<sup>nd</sup> peak, after addition of  
488 extracellular  $\text{Ca}^{2+}$ : PM-based uptake. (C) Measurement with D3cpV-px according to the paradigm in (B). Two  
489  $\text{Ca}^{2+}$  peaks of the experimental paradigm are detectable with D3cpV-px,  $n \geq 50$  cells from three experiments.  
490 (D) Absolute  $\text{Ca}^{2+}$  concentration dynamics calculated from the data in (C). (E) Basal and maximum (max)  $\text{Ca}^{2+}$   
491 concentrations in peroxisomes based on (C). (F) Measurement with pericam-px according to the paradigm in  
492 (B),  $n = 27$  cells from three experiments. (G) Simultaneous measurement of cytosolic (blue) and peroxisomal  
493 (green)  $\text{Ca}^{2+}$ . No delay of signal increase after histamine addition, but a delayed drop of the signal in  
494 peroxisomes. Left y axis: of D3cpV-px (peroxisomal sensor). Right y axis:  $F_n/F_0$  ratio of R-GECO1 (cytosolic  
495 sensor),  $n = 35$  cells from three experiments. (H) Decline of  $F_n/F_0$  ratio per millisecond (ms) in the linear part  
496 of the curves in (G) (from second 65 to 115, Student's t-test). Kinetic delay in decrease in peroxisomal signal  
497 is seen. (I) Comparison of cytosolic, mitochondrial and peroxisomal  $\text{Ca}^{2+}$  response measured following the  
498 paradigm in (B). Characteristic two peaks present in all three compartments. (J) Basal levels of  $\text{Ca}^{2+}$  in  
499 peroxisomes are similar to mitochondria. Analysis performed based on the data from (I). (K) Peroxisomal  $\text{Ca}^{2+}$   
500 increase upon ER-store depletion is smaller than that of cytosol or mitochondria. Analysis performed based  
501 on the data from (I). (L) Peroxisomal  $\text{Ca}^{2+}$  increase upon PM-based cellular uptake of  $\text{Ca}^{2+}$  is comparable to  
502 mitochondria. Analysis performed based on the data from (I). (A, C, D, F) Data presented as mean  $\pm$  SEM. (J-  
503 L) One-way ANOVA followed by Tukey's post hoc test was used for the statistical analysis. \*\*\* $p < 0.001$ ,  
504 \*\*\*\* $p < 0.0001$ , Tukey's box plots. Cyto: cytosolic, mito: mitochondrial, pero: peroxisomal.  $n = 83$  (cyto), 116  
505 (mito), 117 (pero) cells from six independent experiments.



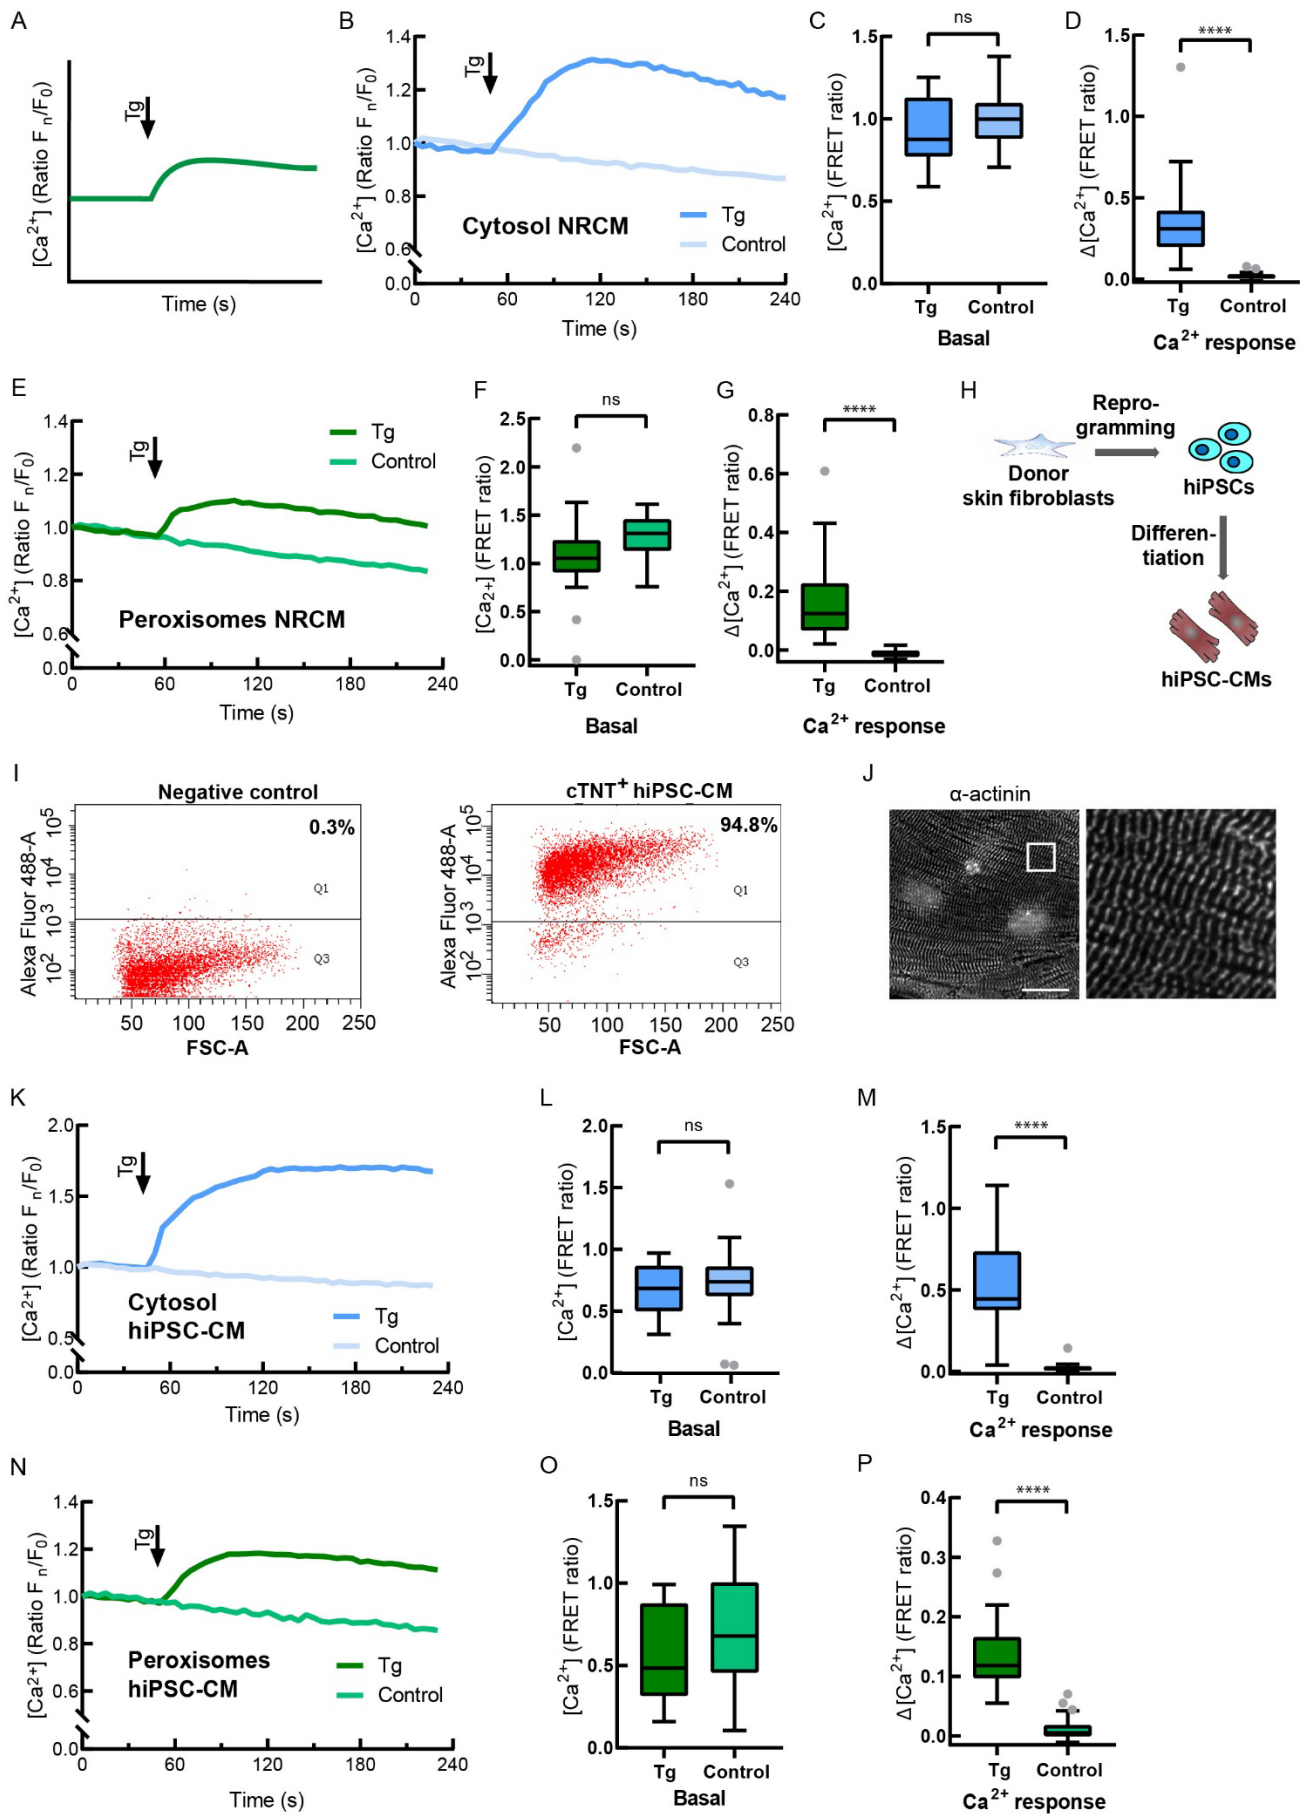

507 **Figure 3: Measurement of peroxisomal  $\text{Ca}^{2+}$  in cardiomyocytes.** (A) Experimental paradigm of  $\text{Ca}^{2+}$   
508 measurement in excitable cells. The peak after thapsigargin (Tg) addition represents  $\text{Ca}^{2+}$  increase due to the  
509 SERCA inhibition and  $\text{Ca}^{2+}$  retention in the cytosol. (B) Cytosolic  $\text{Ca}^{2+}$  measurement in NRCMs following the  
510 experimental design in (A), n = 25 (Tg), 22 (control) from three experiments. Addition of Tg is compared to  
511 the addition of Tg-free buffer (control). (C) Basal levels are not different before the treatment in (B). (D) After  
512 Tg addition in (B) cytosolic  $\text{Ca}^{2+}$  increases. (E) Peroxisomal  $\text{Ca}^{2+}$  measurement in NRCMs following the  
513 experimental design in (A). Addition of Tg is compared to the addition of Tg-free buffer (control), n = 20 (Tg),  
514 31 (control) from three experiments. (F) Basal levels of  $\text{Ca}^{2+}$  are not different before the treatment in (E). (G)  
515 Peroxisomal  $\text{Ca}^{2+}$  increases after Tg addition in (E). (H) hiPSC-CMs generation. Donor skin fibroblasts were  
516 reprogrammed to hiPSCs, which were then differentiated to CMs. (I) hiPSC-CMs were stained for cardiac  
517 troponin (cTnT) and analyzed by flow cytometry. Negative control without primary antibody. 94.8% of iPSC-  
518 CMs are cTnT-positive (cTnT<sup>+</sup>). (J) Immunofluorescence staining visualized  $\alpha$ -actinin protein expression and  
519 regular sarcomeric organization. Scale bar: 20  $\mu\text{m}$ . (K) Cytosolic  $\text{Ca}^{2+}$  measurement in hiPSC-CMs with D3cpV  
520 following the experimental paradigm for excitable cells in (A). Addition of Tg is compared to the addition of  
521 Tg-free buffer (control) to avoid artefacts and false results due to mechanical effect on the cells due to the  
522 addition itself. n = 24 (Tg), 27 (control) from three differentiation experiments. (L) No difference is found  
523 between two groups before the treatment in (K). (M) Tg addition in (K) results in cytosolic  $\text{Ca}^{2+}$  increase. (N)  
524 Peroxisomal  $\text{Ca}^{2+}$  measurement in hiPSC-CMs with D3cpV-px following the experimental design in for  
525 excitable cells depicted in (A). Addition of Tg is compared to the addition of Tg-free buffer (control). n = 26  
526 (Tg), 33 (control) from three differentiation experiments. (O) Basal levels of  $\text{Ca}^{2+}$  are not different before the  
527 treatment in (N). (P) Peroxisomal  $\text{Ca}^{2+}$  increases after Tg addition in (M). (B, E, K, N) Data presented as means  
528 from three independent experiments. (C, D, F, G, L, M, O, P) Unpaired Student's t-test was used for the  
529 statistical analysis. \*\*\*\*p < 0.0001, Tukey's box plots.

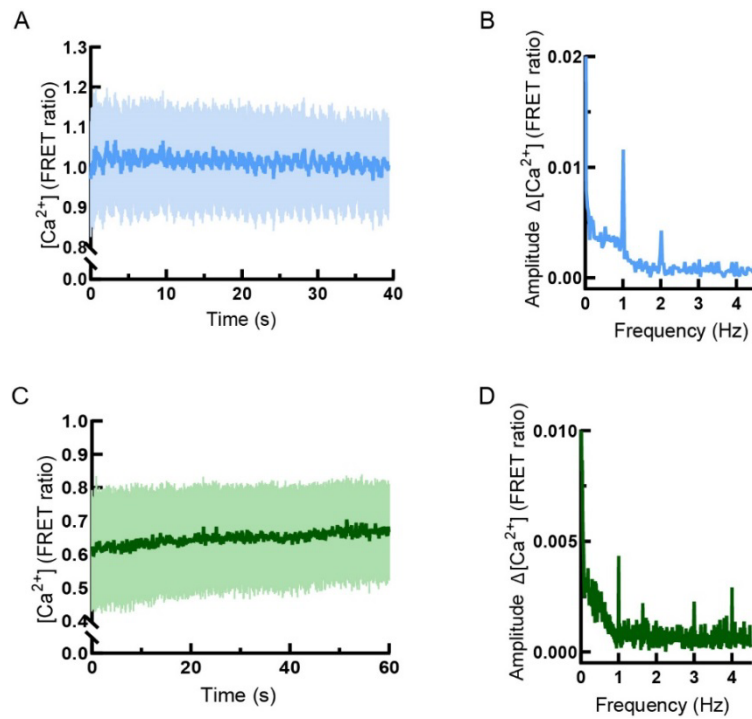

530

531 **Figure 4: Measurement of peroxisomal  $Ca^{2+}$  in paced cardiomyocytes.** (A) D3cpV transfected NRCMs are  
532 stimulated with 1 Hz. Images are taken every 50 ms. Oscillations of FRET ratio are seen,  $n = 3$ . (B) FFT from  
533 the data in (A). Signal increases are rhythmic and correspond to the pacing frequency. (C) D3cpV-px  
534 transfected NRCMs are stimulated with 1 Hz. Images are taken every 100 ms. FRET ratio oscillations are seen.  
535  $n = 3$ . (D) FFT from the data in (C). Signal increases are rhythmic and correspond to the pacing frequency.

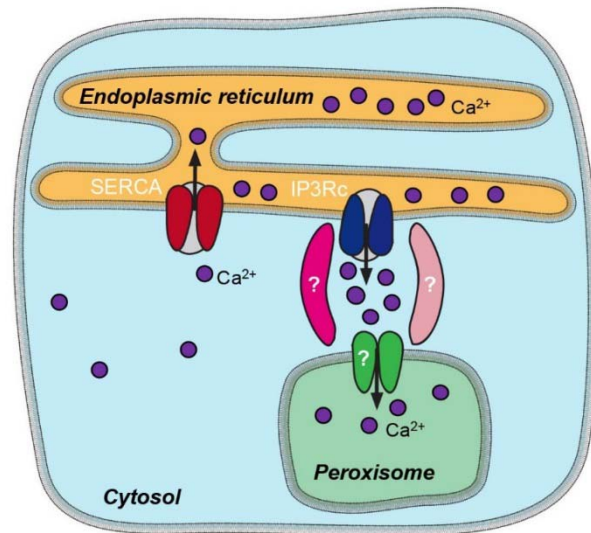

536

537 **Figure 5: Peroxisomal Ca<sup>2+</sup> entry and cellular Ca<sup>2+</sup> distribution.** ER Ca<sup>2+</sup> release triggers Ca<sup>2+</sup> entry into the  
 538 peroxisome. In our hypothetical model, ER-peroxisome proximity defines Ca<sup>2+</sup> microdomains with locally  
 539 elevated Ca<sup>2+</sup> concentration shielded from the cytosol. As a result, Ca<sup>2+</sup> entry to peroxisomes follows the local  
 540 gradient but peroxisomal Ca<sup>2+</sup> is eventually higher than in the cytosol. IP3Rc: IP<sub>3</sub> receptor calcium release  
 541 channel of the ER.

542 **Table**

543 **Table 1. Key properties of the GECIs for cytosol and peroxisome**

| Cytosolic GECIs     |                                    |                     | Peroxisomal GECIs (this study) |                                                      |
|---------------------|------------------------------------|---------------------|--------------------------------|------------------------------------------------------|
| Construct Name      | K <sub>d</sub> ( <i>in vitro</i> ) | Dynamic range, D    | Construct Name                 | Maximal increase upon 1 mM Ca <sup>2+</sup> addition |
| D3cpV               | 0.6 μM <sup>(1)</sup>              | 5.0 <sup>(1)</sup>  | D3cpV-px                       | 1.50 x                                               |
| D1cpV               | 60 μM <sup>(2)</sup>               | 1.7 <sup>(3)</sup>  | D1cpV-px                       | 1.08 x                                               |
| Ratiometric-pericam | 1.7 μM <sup>(4)</sup>              | 10.0 <sup>(4)</sup> | Pericam-px                     | 1.50 x                                               |

544 References: <sup>1</sup> Palmer et al. (2006); <sup>2</sup> Palmer et al. (2004); <sup>3</sup> Greotti et al. (2016) <sup>4</sup> Nagai et al. (2001)
